# Supplementary material
Source: publisher figshare collection journal article supplement (https://acs.figshare.com/ndownloader/files/4405639)
Supplement: Supplementary file 1 [file 4405639]

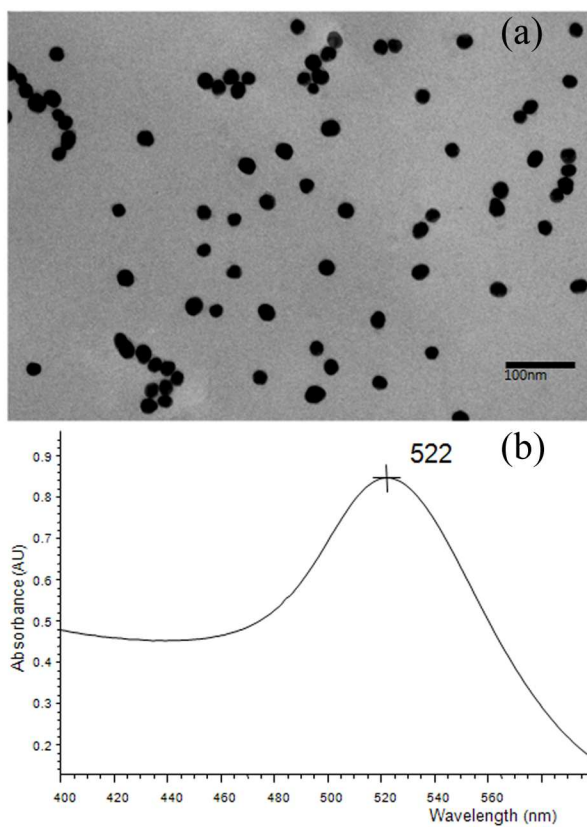

**Figure 1.** Transmission electron micrograph (a) and visible spectrum (b) of the colloidal gold solution.

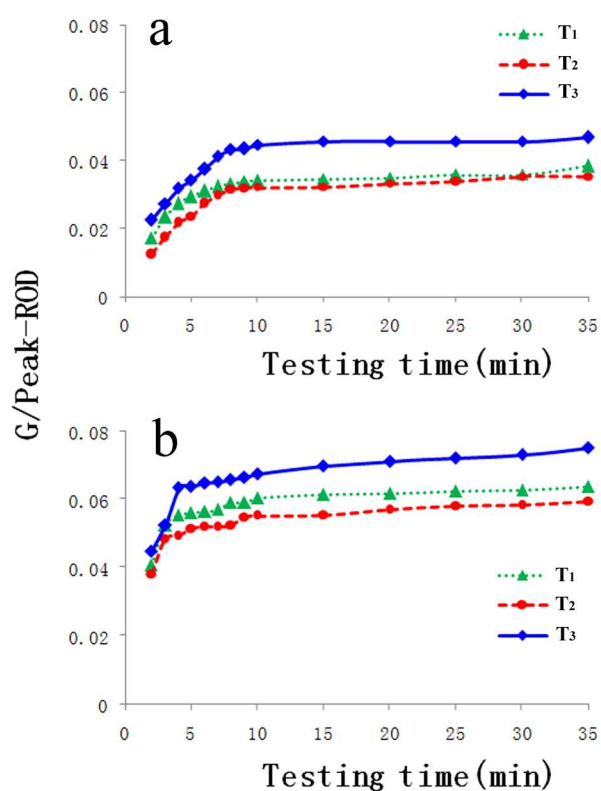

**Figure 2.** The trend of color intensity in the test lines versus times with 0.01M phosphate buffer. (a) Test strips made with three conjugate pads; (b) Test strips made with a single conjugate pad. T<sub>1</sub> (BSA-SM<sub>2</sub>), T<sub>2</sub> (SDZ-BSA) and T<sub>3</sub> (SQX-BSA) represent the competitors for SM<sub>2</sub>, SDZ and SQX, respectively. Each value represents the mean of four replicates.
